# Supplementary material
Source: PubMed Central journal article supplement (PMC5093050)
Supplement: NIHMS814529-supplement.pdf [file NIHMS814529-supplement.pdf]

# **Supplemental Information**

## **Common Evolutionary Origin of Procapsid Proteases, Phage Tail Tubes, and Tubes of Bacterial Type VI Secretion Systems**

Andrei Fokine<sup>1,\*</sup> and Michael G. Rossmann<sup>1,\*</sup>

<sup>1</sup>Department of Biological Sciences, Hockmeyer Hall of Structural Biology, 240 South Martin Jischke Drive, Purdue University, West Lafayette, IN 47907, USA.

\*Correspondence: Email: [afokine@purdue.edu](mailto:afokine@purdue.edu) (A. F); [mr@purdue.edu](mailto:mr@purdue.edu) (M. G. R)

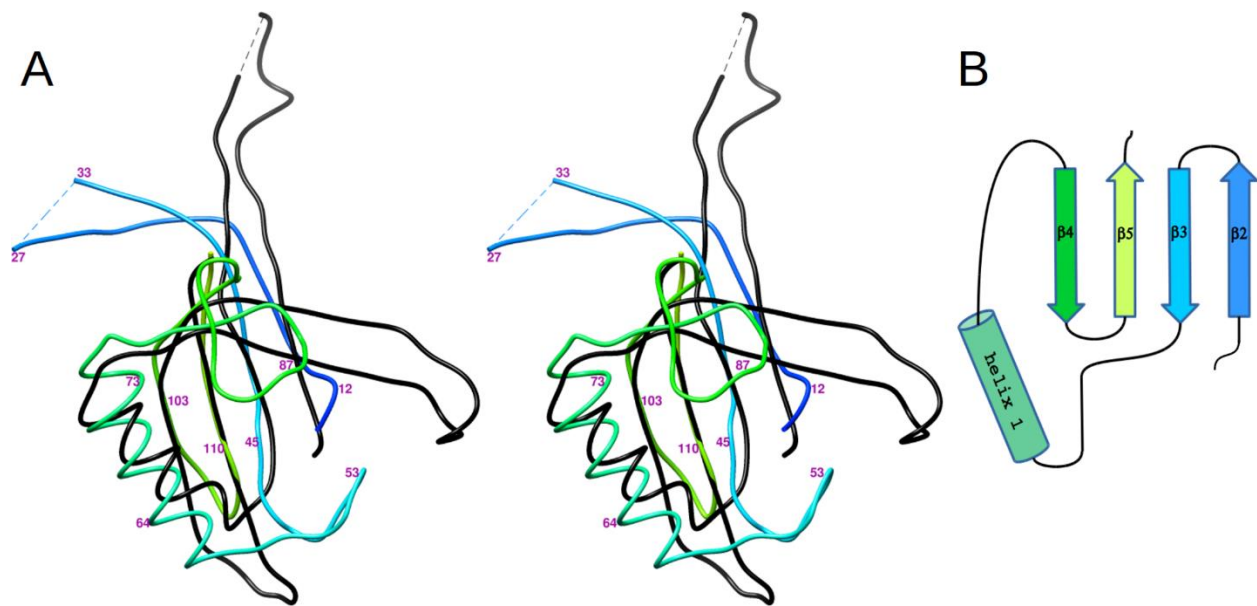

**Figure S1, related to Figure 6. Comparison of the T4 capsid assembly protease, gp21, with the Hcp1 protein forming the tubes of bacterial type VI secretion system. (A) Stereo view of the superposition of T4 gp21 with Hcp1 (PDB ID: 1y12). Region 10 - 116 of gp21 is rainbow-colored from blue at the N-terminus to yellow-green at the C-terminus. Region 27 – 130 of Hcp1 is shown in black. Residue numbers for the gp21 chain are shown in magenta. (B) Schematic diagram showing topology of the conserved structural motif.**
